# Supplementary material
Source: MDPI journal article supplement (https://www.mdpi.com/2311-5637/9/3/298)
Supplement: s1 [file s1]

Supplementary Table S1: Bacterial isolates showing results of Gram staining, appearance and growth in lignin and starch media.

| S/N | Sample Name | Gram Test | Shape | Arrangement | Lignin | Starch |
|-----|-------------|-----------|-------|-------------|--------|--------|
| 1   | A1          | +         | Cocci | Clusters    | +      | +      |
| 2   | A12         | +         | Cocci | Clusters    | +      | +      |
| 3   | A15         | +         | Rod   | Chains      | +      | +      |
| 4   | A16         | +         | Cocci | Pairs       | +      | +      |
| 5   | A18         | +         | Cocci | Chains      | +      | +      |
| 6   | A3          | -         | Cocci | Clusters    | +      | -      |
| 7   | A5B         | -         | Rod   | Chains      | +      | +      |
| 8   | A6          | +         | Cocci | Chains      | +      | +      |
| 9   | A7          | -         | Cocci | Clusters    | +      | +      |
| 10  | A8B         | +         | Rods  | Clusters    | +      | +      |
| 11  | A9          | -         | Rods  | Pairs       | +      | +      |
| 12  | A2          | +         | Cocci | Chains      | +      | +      |
| 13  | A4          | -         | Cocci | Clusters    | +      | +      |
| 14  | A10         | -         | Rods  | Clusters    | +      | +      |
| 15  | A11         | -         | Rods  | Pairs       | +      | +      |
| 16  | A13         | +         | Cocci | Chains      | +      | +      |
| 17  | A17         | +         | Cocci | Clusters    | +      | +      |
| 18  | A19         | -         | Cocci | Chains      | +      | +      |
| 19  | A14         | +         | Cocci | Pairs       | +      | -      |
| 20  | AB1         | +         | Cocci | Clusters    | +      | +      |
| 21  | AB2         | +         | Cocci | Clusters    | +      | +      |
| 22  | AB3         | -         | Cocci | Clusters    | -      | +      |
| 23  | AB4         | -         | Rod   | Chains      | +      | +      |
| 24  | AB5         | -         | Cocci | Pairs       | +      | -      |
| 25  | AB6         | +         | Cocci | Chains      | +      | -      |
| 26  | AB7         | +         | Cocci | Clusters    | +      | +      |
| 27  | AB8         | -         | Rod   | Chains      | +      | +      |
| 28  | AB9A        | +         | Cocci | Chains      | +      | +      |
| 29  | AB9B        | +         | Cocci | Clusters    | +      | -      |
| 30  | AB11        | +         | Rods  | Clusters    | +      | +      |
| 31  | AB12        | +         | Rods  | Pairs       | +      | -      |
| 32  | AB13        | +         | Cocci | Chains      | -      | +      |
| 33  | AB14        | +         | Cocci | Clusters    | +      | -      |
| 34  | AB15        | +         | Cocci | Clusters    | +      | -      |
| 35  | AB16        | +         | Cocci | Clusters    | +      | +      |
| 36  | AB17        | +         | Rod   | Chains      | +      | -      |
| 37  | AB18        | +         | Cocci | Clusters    | +      | +      |
| 38  | BC1         | -         | Cocci | Clusters    | +      | -      |
| 39  | BC2         | -         | Rod   | Chains      | +      | +      |
| 40  | BC3         | +         | Cocci | Pairs       | +      | +      |
| 41  | BC4         | +         | Cocci | Chains      | +      | +      |
| 42  | BC6         | +         | Cocci | Clusters    | +      | +      |
| 43  | BC7         | +         | Rod   | Chains      | +      | +      |
| 44  | BC8         | +         | Cocci | Clusters    | +      | -      |
| 45  | BC9         | +         | Cocci | Clusters    | +      | -      |
| 46  | BC10        | +         | Rod   | Chains      | +      | -      |

|    |      |   |       |          |   |   |
|----|------|---|-------|----------|---|---|
| 47 | BC11 | - | Cocci | Pairs    | - | - |
| 48 | BC12 | + | Cocci | Chains   | + | - |
| 49 | BC13 | + | Cocci | Clusters | + | - |
| 50 | BC14 | + | Rod   | Chains   | + | - |
| 51 | BC15 | - | Cocci | Chains   | + | - |
| 52 | BC16 | + | Cocci | Clusters | + | + |
| 53 | BC17 | - | Rods  | Clusters | + | + |
| 54 | BC18 | - | Rods  | Pairs    | + | - |
| 55 | BD7  | + | Cocci | Chains   | + | - |
| 56 | BD11 | + | Cocci | Clusters | + | + |
| 57 | BD20 | + | Cocci | Clusters | + | - |
| 58 | BD6  | + | Cocci | Clusters | + | + |
| 59 | BD16 |   | Rod   | Chains   | + | + |
| 60 | BD14 | + | Cocci | Pairs    | + | + |
| 61 | BD4  | + | Cocci | Chains   | + | + |
| 62 | BD13 | - | Cocci | Clusters | + | + |
| 63 | BD25 | + | Rod   | Chains   | + | - |
| 64 | BD21 | + | Cocci | Chains   | + | - |
| 65 | BD12 | - | Cocci | Clusters | + | - |
| 66 | BD5  | + | Rods  | Clusters | + | - |
| 67 | BD17 |   | Rods  | Pairs    | + | + |
| 68 | BD3  | - | Cocci | Chains   | + | - |
| 69 | BD24 | - | Cocci | Clusters | + | - |
| 70 | BD19 | + | Cocci | Clusters | + | - |
| 71 | BD2  | - | Cocci | Clusters | + | + |
| 72 | CE1  | + | Rod   | Chains   | + | + |
| 73 | CE2  | + | Cocci | Pairs    | + | + |
| 74 | CE3  | - | Cocci | Chains   | + | + |
| 75 | CE4  | - | Cocci | Clusters | + | + |
| 76 | CE5  | - | Rod   | Chains   | + | + |
| 77 | CE6A | + | Cocci | Chains   | + | - |
| 78 | CE16 | - | Cocci | Clusters | + | + |
| 79 | CEX5 | - | Rods  | Clusters | + | + |
| 80 | CE7  | + | Rods  | Pairs    | + | + |
| 81 | CE8  | + | Cocci | Chains   | + | + |
| 82 | CE9  | + | Cocci | Clusters | + | + |
| 83 | CE10 | - | Cocci | Clusters | + | + |
| 84 | CE11 | - | Cocci | Clusters | + | + |
| 85 | CE12 | - | Rod   | Chains   | - | + |
| 86 | CE14 | + | Cocci | Pairs    | + | + |
| 87 | CE15 | + | Cocci | Chains   | + | + |
| 88 | CF1  | - | Cocci | Clusters | + | + |
| 89 | CF2  | + | Rod   | Chains   | + | + |
| 90 | CF3  | + | Cocci | Chains   | + | + |
| 91 | CF4  | + | Cocci | Clusters | - | + |
| 92 | CF5  | - | Rods  | Clusters | + | + |
| 93 | CF6  | + | Rods  | Pairs    | - | + |
| 94 | CF7  | - | Cocci | Chains   | - | + |
| 95 | CF8  | + | Cocci | Clusters | + | + |
| 96 | CF9  | + | Cocci | Clusters | + | + |
| 97 | CF10 | + | Cocci | Clusters | + | + |

|     |      |   |       |          |   |   |
|-----|------|---|-------|----------|---|---|
| 98  | CF11 | + | Rod   | Chains   | + | + |
| 99  | CF12 | - | Cocci | Pairs    | + | + |
| 100 | CF13 | - | Cocci | Chains   | + | + |
| 101 | CF14 | - | Cocci | Clusters | + | + |
| 102 | CF15 | + | Rod   | Chains   | + | + |
| 103 | CF17 | + | Cocci | Chains   | + | + |
| 104 | CF18 | + | Cocci | Clusters | + | + |
| 105 | CF19 | + | Rods  | Clusters | + | + |
| 106 | CF20 | - | Rods  | Pairs    | + | + |
| 107 | CF21 | + | Cocci | Chains   | + | + |
| 108 | CF22 | - | Cocci | Clusters | + | + |
| 109 | CF23 | + | Cocci | Clusters | + | + |
| 110 | CF24 | + | Cocci | Clusters | + | + |
| 111 | CF25 | + | Rod   | Chains   | + | + |
| 112 | CF26 | + | Cocci | Pairs    | + | + |
| 113 | CF27 | - | Cocci | Chains   | + | + |
| 114 | CF28 | - | Cocci | Clusters | + | + |
| 115 | DG1  | - | Rod   | Chains   | + | + |
| 116 | DG2  | - | Cocci | Chains   | + | + |
| 117 | DG3  | + | Cocci | Clusters | + | + |
| 118 | DG4  | + | Rods  | Clusters | + | + |
| 119 | DG5  | - | Rods  | Pairs    | + | + |
| 120 | DG6  | + | Cocci | Clusters | + | - |
| 121 | DG7  | - | Cocci | Clusters | + | + |
| 122 | DG8  | + | Rod   | Chains   | + | + |
| 123 | DG9  | + | Cocci | Pairs    | + | + |
| 124 | DG10 | + | Cocci | Chains   | + | + |
| 125 | DG11 | + | Cocci | Clusters | - | + |
| 126 | DG12 | - | Rod   | Chains   | + | + |
| 127 | DG13 | - | Cocci | Chains   | + | + |
| 128 | DG14 | - | Cocci | Clusters | - | + |
| 129 | DG15 | + | Rods  | Clusters | + | + |
| 130 | DG16 | + | Rods  | Pairs    | + | + |
| 131 | DG17 | + | Cocci | Chains   | + | + |
| 132 | DG18 | + | Cocci | Clusters | + | + |
| 133 | DG19 | - | Cocci | Clusters | - | + |
| 134 | DG20 | + | Cocci | Clusters | - | + |
| 135 | DG21 | - | Rod   | Chains   | + | + |
| 136 | DG22 | + | Cocci | Pairs    | - | + |
| 137 | DG23 | + | Cocci | Chains   | - | + |
| 138 | DG24 | + | Cocci | Clusters | + | + |
| 139 | DH1  | - | Rod   | Chains   | + | + |
| 140 | DH2  | - | Cocci | Chains   | + | + |
| 141 | DH3  | + | Cocci | Clusters | + | + |
| 142 | DH4  | + | Rods  | Clusters | + | + |
| 143 | DH5  | - | Rods  | Pairs    | + | + |
| 144 | DH6  | + | Cocci | Chains   | + | + |
| 145 | DH7  | - | Cocci | Clusters | + | + |
| 146 | DH8  | + | Cocci | Clusters | + | + |
| 147 | DH9  | + | Cocci | Clusters | + | + |
| 148 | DH10 | + | Rod   | Chains   | + | + |

|     |      |   |       |          |   |   |
|-----|------|---|-------|----------|---|---|
| 149 | DH11 | + | Cocci | Pairs    | + | + |
| 150 | DH12 | - | Cocci | Chains   | + | + |
| 151 | DH13 | - | Cocci | Clusters | - | + |
| 152 | DH14 | - | Rod   | Chains   | + | + |
| 153 | DH15 | + | Cocci | Chains   | + | + |
| 154 | DH16 | + | Cocci | Clusters | + | + |
| 155 | DH17 | - | Rods  | Clusters | + | - |
| 156 | DH18 | + | Rods  | Pairs    | + | + |
| 157 | DH19 | - | Cocci | Chains   | - | + |
| 158 | DH20 | + | Cocci | Clusters | + | + |
| 159 | DH21 | - | Cocci | Clusters | + | + |
| 160 | DH22 | + | Cocci | Clusters | + | + |
| 161 | DH23 | - | Rod   | Chains   | + | + |
| 162 | DH24 | + | Cocci | Pairs    | + | + |
| 163 | DH25 | - | Cocci | Chains   | + | + |
| 164 | DH26 | + | Cocci | Clusters | + | + |
| 165 | DH27 | + | Rod   | Chains   | + | + |
| 166 | DH28 | + | Cocci | Chains   | + | + |
| 167 | DH29 | + | Cocci | Clusters | + | + |
| 168 | DH30 | - | Rods  | Clusters | + | + |
| 169 | DH31 | - | Rods  | Clusters | + | + |
